# Supplementary material for: Functional correlation of bacterial LuxS with their quaternary associations: interface analysis of the structure networks
Source: Springer Nature journal article supplement (doi:10.1186/1472-6807-9-8), 2009-01-01
Supplement: Additional file 1 [file 1472-6807-9-8-s1.pdf]

## SUPPLEMENTARY TABLES

**Table S1:** Summary of interface cluster analysis of the proteins considered in our dataset at  $I_{\min} = 6\%$

| CLASS | NAME OF ORGANISM | TOTX(total no. Of interface clusters) | TOTRES(total no. Of residues in interface clusters) | Mini-triad motif | CLASSIFICATION                                 |
|-------|------------------|---------------------------------------|-----------------------------------------------------|------------------|------------------------------------------------|
| I     | 1j6w             | 5                                     | 36                                                  | TXKXD            | LuxS mutation affects biofilm development      |
|       | 1ste             | 4                                     | 56                                                  | GXNXD            |                                                |
|       | 1stm             | 8                                     | 60                                                  | GXKXD            |                                                |
| II    | 1j6x             | 6                                     | 69                                                  | GXNXD            | LuxS mutation affects metabolism/motility etc. |
|       | 1eco             | 8                                     | 55                                                  | TXHXD            |                                                |
|       | 1cam             | 7                                     | 45                                                  | TXKXD            |                                                |
| III   | 1sta             | 6                                     | 73                                                  | GXNXD            | LuxS from <i>Bacillus sp.</i>                  |
|       | 1j98             | 7                                     | 38                                                  | VXTXG            |                                                |
|       | 1bac             | 7                                     | 45                                                  | VXSXG            |                                                |
| IV    | 2bac             | 10                                    | 56                                                  | VXSXG            | LuxS from extremophiles                        |
|       | 3bac             | 9                                     | 67                                                  | VXTXG            |                                                |
|       | 1inn             | 7                                     | 45                                                  | TXKXD            |                                                |
| V     | 1geo             | 6                                     | 33                                                  | TXRXD            | LuxS mutation affects toxin production         |
|       | 1psy             | 8                                     | 50                                                  | TXSXD            |                                                |
|       | 1the             | 9                                     | 55                                                  | -----            |                                                |
| VI    | 1vib             | 12                                    | 56                                                  | TXKXD            | LuxS from Probiotics                           |
|       | 1clo             | 8                                     | 52                                                  | GXKXD            |                                                |
|       | 1shi             | 7                                     | 52                                                  | TXHXD            |                                                |
|       | 1pyo             | 10                                    | 58                                                  | GXKXD            |                                                |
| VI    | 1lac             | 9                                     | 65                                                  | GXKXD            | LuxS from Probiotics                           |
|       | 2lac             | 7                                     | 50                                                  | GXKXD            |                                                |
|       | 3lac             | 6                                     | 38                                                  | GXKXD            |                                                |
|       | 1bfi             | 10                                    | 61                                                  | GXHXD            |                                                |

The total number of interface clusters vary from 4-12 and the total number of residues in the interface clusters vary from 36 to 73. The mini-triad pattern for each protein is also given in the table with the physiological manifestations of LuxS mutation in each class (except III, IV and V) except for *T.thermophilus* (class IV) in the mini-triad pattern is absent from the sequence.

**Table S2:** Backbone RMSD values of 23 pairs of LuxS proteins from different organisms (from class I-VI)

| rms d | 1vib | 1clo | 1shi | 1pyo | 1j6w | 1ste | 1stm | 1j6x | 1eco | 1cam | 1sta | 1lac | 2lac | 3lac | 1bfi | 1inn | 1geo | 1psy | 1the | 1j98 | 1bac | 2bac | 3bac |
|-------|------|------|------|------|------|------|------|------|------|------|------|------|------|------|------|------|------|------|------|------|------|------|------|
| 1vib  | 0    | 1.04 | 0.42 | 1.10 | 0.60 | 1.28 | 1.11 | 1.40 | 0.40 | 0.42 | 1.32 | 1.06 | 1.07 | 1.04 | 1.10 | 1.14 | 1.09 | 0.41 | 1.06 | 1.18 | 1.22 | 1.15 | 1.20 |
| 1clo  | 1.04 | 0    | 1.00 | 0.49 | 1.14 | 1.09 | 0.56 | 1.21 | 1.01 | 1.01 | 1.10 | 0.53 | 0.51 | 0.48 | 0.50 | 0.62 | 0.43 | 1.05 | 0.48 | 1.08 | 1.10 | 1.06 | 1.17 |
| 1shi  | 0.42 | 1.00 | 0    | 1.06 | 0.55 | 1.24 | 1.08 | 1.36 | 0.33 | 0.40 | 1.32 | 1.03 | 1.04 | 1.02 | 1.06 | 1.09 | 1.05 | 0.38 | 1.03 | 1.18 | 1.23 | 1.16 | 1.24 |
| 1pyo  | 1.10 | 0.49 | 1.06 | 0    | 1.26 | 1.21 | 0.48 | 1.31 | 1.06 | 1.06 | 1.21 | 0.54 | 0.49 | 0.49 | 0.50 | 0.72 | 0.51 | 1.10 | 0.51 | 1.19 | 1.19 | 1.19 | 1.21 |
| 1j6w  | 0.60 | 1.14 | 0.55 | 1.26 | 0    | 1.35 | 1.24 | 1.42 | 0.56 | 0.62 | 1.42 | 1.23 | 1.19 | 1.22 | 1.23 | 1.20 | 1.18 | 0.55 | 1.20 | 1.20 | 1.28 | 1.23 | 1.26 |

|              |      |      |      |      |             |             |             |             |             |             |             |             |             |             |             |             |             |             |             |             |             |             |             |
|--------------|------|------|------|------|-------------|-------------|-------------|-------------|-------------|-------------|-------------|-------------|-------------|-------------|-------------|-------------|-------------|-------------|-------------|-------------|-------------|-------------|-------------|
| <b>1ste</b>  | 1.28 | 1.09 | 1.24 | 1.21 | <b>1.35</b> | <b>0</b>    | <b>1.27</b> | 0.45        | 1.23        | 1.23        | 0.39        | 1.20        | 1.20        | 1.18        | 1.13        | 1.18        | 1.23        | 1.21        | 1.18        | 0.73        | 0.76        | 0.75        | 0.77        |
| <b>1st m</b> | 1.11 | 0.56 | 1.08 | 0.48 | <b>1.24</b> | <b>1.27</b> | <b>0</b>    | 1.37        | 1.10        | 1.12        | 1.26        | 0.50        | 0.50        | 0.52        | 0.56        | 0.75        | 0.53        | 1.13        | 0.53        | 1.28        | 1.32        | 1.24        | 1.31        |
| <b>1j6x</b>  | 1.40 | 1.21 | 1.36 | 1.31 | 1.42        | 0.45        | 1.37        | <b>0</b>    | <b>1.35</b> | <b>1.34</b> | <b>0.43</b> | 1.35        | 1.30        | 1.34        | 1.27        | 1.26        | 1.34        | 1.35        | 1.32        | 0.78        | 0.84        | 0.83        | 0.88        |
| <b>1eco</b>  | 0.40 | 1.01 | 0.33 | 1.06 | 0.56        | 1.23        | 1.10        | <b>1.35</b> | <b>0</b>    | <b>0.38</b> | <b>1.30</b> | 1.04        | 1.02        | 1.02        | 1.05        | 1.10        | 1.07        | 0.38        | 1.04        | 1.17        | 1.22        | 1.16        | 1.19        |
| <b>1cam</b>  | 0.42 | 1.01 | 0.40 | 1.06 | 0.62        | 1.23        | 1.12        | <b>1.34</b> | <b>0.38</b> | <b>0</b>    | <b>1.28</b> | 1.07        | 1.08        | 1.08        | 1.09        | 1.14        | 1.09        | 0.38        | 1.09        | 1.13        | 1.22        | 1.13        | 1.17        |
| <b>1sta</b>  | 1.32 | 0.53 | 1.32 | 1.21 | 1.42        | 0.39        | 1.26        | <b>0.43</b> | <b>1.30</b> | <b>1.28</b> | <b>0</b>    | 1.22        | 1.22        | 1.23        | 1.14        | 1.22        | 1.22        | 1.28        | 1.21        | 0.72        | 0.77        | 0.76        | 0.79        |
| <b>1lac</b>  | 1.06 | 0.53 | 1.03 | 0.54 | 1.23        | 1.20        | 0.50        | 1.35        | 1.04        | 1.07        | 1.22        | <b>0</b>    | <b>0.52</b> | <b>0.51</b> | <b>0.52</b> | 0.71        | 0.52        | 1.08        | 0.54        | 1.21        | 1.24        | 1.17        | 1.24        |
| <b>2lac</b>  | 1.07 | 0.51 | 1.04 | 0.49 | 1.19        | 1.20        | 0.50        | 1.30        | 1.02        | 1.08        | 1.22        | <b>0.51</b> | <b>0</b>    | <b>0.42</b> | <b>0.50</b> | 0.66        | 0.50        | 1.05        | 0.53        | 1.23        | 1.25        | 1.21        | 1.23        |
| <b>3lac</b>  | 1.04 | 0.48 | 1.02 | 0.49 | 1.22        | 1.18        | 0.52        | 1.34        | 1.02        | 1.08        | 1.23        | <b>0.52</b> | <b>0.42</b> | <b>0</b>    | <b>0.44</b> | 0.59        | 0.48        | 1.06        | 0.52        | 1.26        | 1.23        | 1.21        | 1.22        |
| <b>1bfi</b>  | 1.10 | 0.50 | 1.06 | 0.50 | 1.23        | 1.13        | 0.56        | 1.27        | 1.05        | 1.09        | 1.14        | <b>0.51</b> | <b>0.50</b> | <b>0.44</b> | <b>0</b>    | 0.64        | 0.52        | 1.10        | 0.53        | 1.15        | 1.22        | 1.16        | 1.20        |
| <b>1inn</b>  | 1.14 | 0.62 | 1.09 | 0.72 | 1.20        | 1.18        | 0.75        | 1.26        | 1.10        | 1.14        | 1.22        | 0.71        | 0.66        | 0.59        | 0.64        | <b>0</b>    | <b>0.49</b> | <b>1.12</b> | <b>0.67</b> | 1.16        | 1.21        | 1.16        | 1.26        |
| <b>1geo</b>  | 1.09 | 0.43 | 1.05 | 0.51 | 1.18        | 1.23        | 0.53        | 1.34        | 1.07        | 1.09        | 1.22        | 0.52        | 0.50        | 0.48        | 0.52        | <b>0.49</b> | <b>0</b>    | <b>1.10</b> | <b>0.44</b> | 1.17        | 1.17        | 1.17        | 1.22        |
| <b>1psy</b>  | 0.41 | 1.05 | 0.38 | 1.10 | 0.55        | 1.21        | 1.13        | 1.35        | 0.38        | 0.38        | 1.28        | 1.08        | 1.05        | 1.06        | 1.10        | <b>1.12</b> | <b>1.10</b> | <b>0</b>    | <b>1.08</b> | 1.18        | 1.19        | 1.11        | 1.18        |
| <b>1the</b>  | 1.06 | 0.48 | 1.03 | 0.51 | 1.20        | 1.18        | 0.53        | 1.32        | 1.04        | 1.09        | 1.21        | 0.54        | 0.53        | 0.52        | 0.53        | <b>0.67</b> | <b>0.44</b> | <b>1.08</b> | <b>0</b>    | 1.18        | 1.19        | 1.16        | 1.22        |
| <b>1j98</b>  | 1.18 | 1.08 | 1.18 | 1.19 | 1.20        | 0.73        | 1.28        | 0.78        | 1.17        | 1.13        | 0.72        | 1.21        | 1.23        | 1.26        | 1.15        | 1.16        | 1.17        | 1.18        | 1.18        | <b>0</b>    | <b>0.40</b> | <b>0.44</b> | <b>0.37</b> |
| <b>1bac</b>  | 1.22 | 1.10 | 1.23 | 1.19 | 1.28        | 0.76        | 1.32        | 0.84        | 1.22        | 1.22        | 0.77        | 1.24        | 1.25        | 1.23        | 1.22        | 1.21        | 1.17        | 1.19        | 1.19        | <b>0.40</b> | <b>0</b>    | <b>0.46</b> | <b>0.35</b> |
| <b>2bac</b>  | 1.15 | 1.06 | 1.16 | 1.19 | 1.23        | 0.75        | 1.24        | 0.83        | 1.16        | 1.13        | 0.76        | 1.17        | 1.21        | 1.21        | 1.16        | 1.16        | 1.17        | 1.11        | 1.16        | <b>0.44</b> | <b>0.46</b> | <b>0</b>    | <b>0.45</b> |

|          |      |      |      |      |      |      |      |      |      |      |      |      |      |      |      |      |      |      |      |      |      |      |   |
|----------|------|------|------|------|------|------|------|------|------|------|------|------|------|------|------|------|------|------|------|------|------|------|---|
| 3ba<br>c | 1.20 | 1.17 | 1.24 | 1.21 | 1.26 | 0.77 | 1.31 | 0.88 | 1.19 | 1.17 | 0.79 | 1.24 | 1.23 | 1.22 | 1.20 | 1.26 | 1.22 | 1.18 | 1.22 | 0.37 | 0.35 | 0.45 | 0 |
|----------|------|------|------|------|------|------|------|------|------|------|------|------|------|------|------|------|------|------|------|------|------|------|---|

It can be readily noted that all the values are < 1.5, indicating the similarity in the backbone structures for the proteins in our dataset. Bold highlights indicate the rmsd values within members of a particular class.

**Table S3:** Detailed description of residues present in the interface clusters at Imin = 6% for Class (I-VI)

| CLUSTER NO.    | 1VIB                            |                                            | 1J6W                                       |                                            | 1J6X                                                                |                                                           | 1LAC                 |                                                         | 1J98                                 |                                                         | 1INN                |                                            |
|----------------|---------------------------------|--------------------------------------------|--------------------------------------------|--------------------------------------------|---------------------------------------------------------------------|-----------------------------------------------------------|----------------------|---------------------------------------------------------|--------------------------------------|---------------------------------------------------------|---------------------|--------------------------------------------|
|                | CHAIN A                         | CHAIN B                                    | CHAIN A                                    | CHAIN B                                    | CHAIN A                                                             | CHAIN B                                                   | CHAIN A              | CHAIN B                                                 | CHAIN A                              | CHAIN B                                                 | CHAIN A             | CHAIN B                                    |
| ACTIVE SITE I  | 82G, 7F, 4L                     | 54H, 57E, 134H, 123L, 120I, 55T, 58H, 122E | 5F, 2L, 77C                                | 50H, 54H, 126H, 53E, 115L, 112I, 51T, 114E | 3V, 6F, 2N, 46H, 76Q                                                | 51H, 55H, 122H, 59E, 121N, 118W, 52S, 108V, 56L, 110A     | 4V, 7F, 5E, 79C, 23T | 54H, 58H, 130H, 55T, 65R, 71Y, 64L, 103S, 85L, 36F, 38L | 1V, 4F                               | 51H, 55H, 128H, 52T, 114I, 130L, 134K, 131E, 138R, 116A | 5F, 2V              | 56H, 52H, 55E, 121H, 53T, 107I, 110V, 109G |
| ACTIVE SITE II | 54H, 57E, 134H, 123L, 58H, 122E | 82G, 7F, 4L                                | 50H, 54H, 126H, 53E, 115L, 112I, 51T, 114E | 5F, 2L, 77C                                | 51H, 55H, 122H, 59E, 121N, 118W, 62R, 68V, 61I, 110A, 116C          | 46H, 76Q, 6F, 2N, 3V                                      | -----                | -----                                                   | 51H, 54E, 55H, 116A, 128H, 52T, 114I | 1V, 4F, 80G                                             | -----               | -----                                      |
| APEX CLUSTER   | 27T, 29K, 31D                   | 27T, 29K, 31D                              | 23T, 25K, 27D                              | 23T, 25K, 27D                              | 26G, 28N, 30D, 85N, 84L,                                            | 27V, 28N, 30D, 85N                                        | 28Q, 29K, 31D        | 28Q, 29K, 31D                                           | -----                                | -----                                                   | 25T, 27K, 29D       | 25T, 27K, 29D                              |
| IV             | 10D, 13R, 161L, 12T, 126Y       | 126Y, 125E, 10D, 13R, 161L                 | 43I, 78R, 125E, 47K                        | 43I, 78R, 125E, 47K                        | 4E, 19R, 36D, 17Y, 38R, 77T, 144V, 8L, 80Y, 34K, 22D, 82T, 69V, 70D | 70D, 24K, 4E, 19R, 36D, 17Y, 38R, 77T, 144V, 8L, 80Y, 34K | 10D, 13K, 158E       | 122E                                                    | 24V                                  | 24V, 74I, 89S                                           | 8D, 11K, 144I, 146L | 113L                                       |

|      |                                             |                             |  |  |            |      |                                                                                                              |                                                           |                       |                       |                     |                                    |
|------|---------------------------------------------|-----------------------------|--|--|------------|------|--------------------------------------------------------------------------------------------------------------|-----------------------------------------------------------|-----------------------|-----------------------|---------------------|------------------------------------|
| V    | 20R,<br>9V,<br>37D,<br>81M,<br>88Y,<br>156N | 77D,<br>65R,<br>75I,<br>89M |  |  | 9D,<br>12K | 114K | 14V,<br>18Y,<br>153E,<br>15K,<br>37D,<br>20R,<br>9L,<br>155H,<br>84H,<br>35N,<br>22I,<br>77F,<br>39R,<br>81T | 57E                                                       | 81Q,<br>124Q,<br>127L | 81Q,<br>124Q,<br>127L | 70D,<br>33K,<br>79Y | 3E,<br>23K,<br>33K,<br>79Y,<br>70D |
| VI   | 47I,<br>84R                                 | 133M,<br>130T,              |  |  |            |      | 33I,<br>86L,<br>88W,<br>72I,<br>25E                                                                          | 33I,<br>88W                                               | 119E,<br>126K         | 41N                   | 76R                 | 120D,<br>117N                      |
| VII  | 74E,<br>92I                                 | 25M                         |  |  |            |      | 50T,<br>129D,<br>126N,<br>80R                                                                                | 80R,<br>50T,<br>129D,<br>126N                             | 75D                   | 22H,<br>32K           | 112E,<br>118Y       | 42N                                |
| VIII | 50E                                         | 47I,<br>84R                 |  |  |            |      | 75S                                                                                                          | 75S,<br>84H,<br>35N,<br>23T,<br>7F,<br>86L,<br>72I,<br>5E |                       |                       |                     |                                    |

Some clusters have been merged together for simplicity of representation.

**Table S4:** Description of the hubs present in LuxS from extremophiles at different I<sub>min</sub> values (the numbering of residues are done according to sequence)

| Protein code | I <sub>min</sub> | Total no. Of Hubs | Centre of Hub | Hub Residues                   |
|--------------|------------------|-------------------|---------------|--------------------------------|
| 1inn         | 6%               | 4                 | 21Y(A)        | {17V, 151Q, 40D, 42R} (A)      |
|              |                  |                   | 131H(A)       | {57H, 61H, 58T, 117I,120V} (A) |
|              |                  |                   | 21Y(B)        | {17V, 151Q, 40D, 42R} (B)      |
|              |                  |                   | 131H(B)       | {57H, 61H, 58T, 117I,120V} (B) |
|              | 8%               | 3                 | 21Y(A)        | {17V, 151Q, 40D, 42R} (A)      |

|      |    |     |          |                                 |                           |                           |
|------|----|-----|----------|---------------------------------|---------------------------|---------------------------|
|      |    |     | 131H(A)  | {57H, 61H, 58T, 117I, 120V} (A) |                           |                           |
|      |    |     | 21Y(B)   | {17V, 151Q, 40D, 42R} (B)       |                           |                           |
|      |    |     | 10%      | 2                               | 21Y(A)                    | {17V, 151Q, 40D, 42R} (A) |
|      |    |     |          |                                 | 21Y(B)                    | {17V, 151Q, 40D, 42R} (B) |
|      |    |     | 12%      | 1                               | 21Y(A)                    | {17V, 151Q, 40D, 42R} (A) |
| 1geo | 6% | 3   | 18Y (A)  | {14V, 148Q, 37D, 39R} (A)       |                           |                           |
|      |    |     | 39R (A)  | {18Y, 11H, 77M, 81T} (A)        |                           |                           |
|      |    |     | 18Y (B)  | {14V, 148Q, 37D, 39R} (B)       |                           |                           |
|      |    | 8%  | 2        | 18Y (A)                         | {14V, 148Q, 37D, 39R} (A) |                           |
|      |    |     |          | 18Y (B)                         | {14V, 148Q, 37D, 39R} (B) |                           |
|      |    | 10% | 1        | 18Y (B)                         | {14V, 148Q, 37D, 39R} (B) |                           |
|      |    | 12% | 1        | 18Y (B)                         | {14V, 148Q, 37D, 39R} (B) |                           |
| 1psy | 6% | 5   | 39R (A)  | {11H, 14M, 81M, 85T} (A)        |                           |                           |
|      |    |     | 60Y (A)  | {38L, 104W, 40F, 64M} (A)       |                           |                           |
|      |    |     | 104W (A) | {38L, 60Y, 40F, 108M} (A)       |                           |                           |
|      |    |     | 134H (A) | {58H, 123L, 54H, 55T} (A)       |                           |                           |
|      |    |     | 39R (B)  | {11H, 14M, 81M, 85T} (B)        |                           |                           |

|      |     |   |          |                           |
|------|-----|---|----------|---------------------------|
|      | 8%  | 1 | 134H (A) | {58H, 123L, 54H, 55T} (A) |
| 1the | 6%  | 2 | 18Y (A)  | {14V, 148Q, 37D, 39R} (A) |
|      |     |   | 18Y (B)  | {14V, 148Q, 37D, 39R} (B) |
|      | 8%  | 2 | 18Y (A)  | {14V, 148Q, 37D, 39R} (A) |
|      |     |   | 18Y (B)  | {14V, 148Q, 37D, 39R} (B) |
|      | 10% | 2 | 18Y (A)  | {14V, 148Q, 37D, 39R} (A) |
|      |     |   | 18Y (B)  | {14V, 148Q, 37D, 39R} (B) |
|      | 11% | 1 | 18Y (B)  | {14V, 148Q, 37D, 39R} (B) |

The table reveals the presence of hubs at higher  $l_{min}$  values for this class for 1psy (psychrophile), 1inn and 1geo (extreme radiation-resistant) and 1the (hyperthermophile). They all belong to the broad category of extremophiles.

Table S5

| MINI-TRIAD MOTIF | BACTERIAL SPECIES (frequency of contribution)                                              |
|------------------|--------------------------------------------------------------------------------------------|
| GKD              | STR(22) LAC(15) CLO(4)                                                                     |
| TKD              | SHE(16) CAM(9) HAE(7) VIB(6)<br>NEI(5) ACT(2) HEL, PAS, ARC,<br>DEI, PHO, MAN, MAR, WOL(1) |
| TND              | AER(2)                                                                                     |
| VTG              | BAC(4)                                                                                     |
| VSG              | BAC(7) ARC, GEO(1)                                                                         |
| ISG              | BAC(1) GEO(1)                                                                              |
| EGE              | BAC(1)                                                                                     |
| GHD              | LIS(4) BIF(2) CHR, DIC(1)                                                                  |
| TEV              | BOR(3)                                                                                     |

|     |                                                                     |
|-----|---------------------------------------------------------------------|
| THD | ECO(9) YER(7) SAL(5) SHI(5)<br>SER(2) CIT, PHO, ENT, ERW,<br>SOD(1) |
| KAN | DES(1)                                                              |
| KGV | CLO(1)                                                              |
| TRD | DEI(1)                                                              |
| NDA | ENT(1)                                                              |
| TSD | ENT, PRO, PSY, SHE, SUL(1)                                          |
| GND | STA(18) HEL(4) OCE(1)                                               |
| GNG | LEU(1)                                                              |
| GKG | OEN(1)                                                              |
| YGE | POR(1)                                                              |
| LAD | PRO(1)                                                              |
| GVD | STR(3)                                                              |
| TCD | SUL(1)                                                              |
| LG- | THE(2)                                                              |
| TGD | THI(1)                                                              |

Various bacterial species and the mini-triad motif associated with them across our dataset. The number of species with a particular motif is given in the parenthesis.
